# Supplementary material for: Willingness for cervical cancer screening among socially vulnerable and underserved women in Portugal: a cross-sectional study
Source: Research Square preprint supplement (doi:10.21203/rs.3.rs-5731419/v1), 2026-01-16
Supplement: Supplementary file 1 [file 4f76d5e2c5db24d41e3988ac.pdf]

# Questionnaire

## Demographic information

---

1. What is your date of birth? \_\_\_\_\_ (DD/MM/YYYY)  
Current age \_\_\_\_\_
2. What is your highest degree?  
 No degree                       Secondary school                       University  
 Elementary school                       College
3. What is your current civil status?  
 Single                                       Divorced                                       Widow  
 Married/Cohabiting                       Other: \_\_\_\_\_
4. Do you sometimes encounter difficulties to pay rent or bills for gas/water/electricity?  
 Never                       Sometimes                       Often                       Always                       I'd rather not say
5. Do you sometimes encounter difficulties to pay rent or rent?  
 Never                       Sometimes                       Often                       Always                       I'd rather not say
6. Do you sometimes encounter difficulties to pay for food?  
 Never                       Sometimes                       Often                       Always                       I'd rather not say
7. In which country are you born?  
 Belgium                       Other: \_\_\_\_\_

## Risk factors

---

8. How often have you been pregnant in your life? \_\_\_\_\_
9. Have you ever used hormonal contraceptives for 5 years in a row (or longer)?  
 Yes  
 No  
 I don't know
10. At what age did you have sexual intercourse for the first time? \_\_\_\_\_ (years)
11. Did you ever have a sexually transmitted disease (STD) in your life?  
 Yes  
 No  
 I don't know

12. How often did you use a condom during sexual intercourse?

- Never       Sometimes       Often       Always       I'd rather not say

## Knowledge, attitude and screening habits

---

13. Did you, before you were invited to this study, ever hear of cervical cancer?

- Yes  
 No (please proceed with question 17)  
 I don't want to answer

If yes, by whom or how?

- Medical doctor       Health staff       Radio/television  
 A friend/family member       Other: \_\_\_\_\_       I don't know

14. What causes cervical cancer?

- Bad hygiene       Having multiple sexual partners       Smoking       No reason, just bad luck  
 A bacteria       A virus       I don't know

15. Which of the following symptoms makes you think of/can be related to cervical cancer?

- Abnormal vaginal discharge       Abnormal vaginal bleeding       Bleeding after sexual intercourse  
 Vomiting       Weight loss       Pelvic/abdominal pain  
 Other: \_\_\_\_\_  
 I don't know

16. Can cervical cancer be prevented?

- Yes       No       I don't know

17. Did you, before you were invited to this study, ever hear of a PAP smear (smear test)?

- Yes       No (go to question 21)       I don't know (go to question 21)

18. How is the smear test performed, according to you?

- Oral (through the mouth)       Nasal (through the nose)       Vaginal (through the vagina)  
 Anal (through the anus)       I don't know

19. When did you have your last PAP smear?

- \_\_\_\_\_ (year)       I don't know

20. Why (sometimes) didn't you have a PAP smear taken? (several options are possible)

- It was not important to me
- I thought I was not at risk
- I don't trust medical doctors
- I didn't have the time
- I didn't have the money
- My partner didn't allow me to/didn't prefer this
- I didn't/don't know where to be screened
- I have difficulties accessing hospitals/health centers where I can be screened
- It is embarrassing
- It is painful
- It was too difficult to get an appointment
- Other reasons: \_\_\_\_\_

21. Did you ever hear about the HPV-vaccine or the vaccine against cervical cancer?

- Yes                       No                       I don't know

## Willingness

---

22. Do you think you are at risk to develop cervical cancer?

- Yes                       No                       I don't know

23. Do you think that screening/being tested for cervical cancer can offer advantages for your health?

- Yes                       No                       I don't know

24. Are you willing to be screened for cervical cancer via a PAP smear (= by a gynecologist/physician through a vaginal/pelvic exam)?

- Yes                       No                       I don't know

25. How would you prefer to get tested:

- PAP smear taken by a doctor       Vaginal test you take yourself       Neither one       I don't have a preference

26. Do you feel that you need more information before you want to be screened for cervical cancer?

- Yes                       No
